# Supplementary material for: Designing and Testing of a System for Aerosolization and Recovery of Viable Porcine Reproductive and Respiratory Syndrome Virus (PRRSV): Theoretical and Engineering Considerations
Source: Preprints.org preprint supplement (doi:10.20944/preprints202102.0253.v1), 2021-02-10
Supplement: Supplementary file 1 [file supplementary]

## Supplementary Material

### 1      **Uncertainty analyses for a low-cost alternative system for virus aerosolization**

Before the implementation of the current system mentioned in the Materials and Methods section, an initial system was constructed similarly except that the Aalborg mass flow meter (MFM) and mass flow controller (MFC) were replaced by Dwyer flowmeters. Below is the uncertainty analysis of this type of low-cost system. Since MFM and MFC have higher prices than mechanical flowmeters, this could be an alternative way of commissioning the experiment.

Adapted from section 2.2 (main manuscript), the inlet mass flow rate entering the system can be expressed as,

$$\dot{m}_{a1} = \frac{Q_{ob,1}}{v_1} \sqrt{\frac{36.0544P_1 + 530}{T_1 + 460}} \quad [29]$$

the sensitivity and uncertainty of each of the variables can be expressed as,

$\theta$  is calculated by taking the partial derivative regarding each variable,

$$\theta_{Q_{ob,1}} = \frac{\partial \dot{m}_{a1}}{\partial Q_{ob,1}} = \frac{1}{v_1} \sqrt{\frac{36.0544P_1 + 530}{T_1 + 460}} \quad [30]$$

$$U_{Q_{ob,1}} = \pm 3\% \times 40 \text{ L/min} = \pm 1.2 \text{ L/min} = 2 \times 10^{-5} \text{ m}^3/\text{s} \quad [31]$$

(Accuracy  $\times$  Full Scale of the Dwyer flowmeter model VFB-69-BV)

$$\theta_{P_1} = \frac{\partial \dot{m}_{a1}}{\partial P_1} = \frac{18.0272Q_{ob,1}}{v_1 \sqrt{(36.0544P_1 + 530)(T_1 + 460)}} \quad [32]$$

$$U_{P_1} = \pm 2\% \times 30 \text{ psi} = \pm 0.6 \text{ psi} \quad [33]$$

(Accuracy  $\times$  Full Scale of the pressure gauge)

$$\theta_{T_1} = \frac{\partial Q_1}{\partial T_1} = \frac{(-18.0272P_1 - 265)Q_{ob,1}}{(T_1 + 460)^2 v_1 \sqrt{\frac{36.0544P_1 + 530}{T_1 + 460}}} \quad [34]$$

$$U_{T_1} = \pm 0.2 \text{ }^\circ\text{C of reading}$$

$$\theta_{v_1} = \frac{\partial Q_1}{\partial v_1} = -\frac{Q_{ob,1} \sqrt{\frac{36.0544P_1 + 530}{T_1 + 460}}}{v_1^2} \quad [35]$$

$$U_{v_1} = \pm 2.25\%$$

$$U_{\dot{m}_{a1}} = \sqrt{(\theta_{Q_{ob,1}} U_{Q_{ob,1}})^2 + (\theta_{P_1} U_{P_1})^2 + (\theta_{T_1} U_{T_1})^2 + (\theta_{v_1} U_{v_1})^2} \quad [36]$$

23 Supplementary Table 1 shows the measured variables used for a sample calculation.

24 **Supplementary Table 1.** Mass flow model verification based on measured variables.

| Variables                 | Reading                                  | Uncertainty                                      | Position                                      | Measurement Device                   |
|---------------------------|------------------------------------------|--------------------------------------------------|-----------------------------------------------|--------------------------------------|
| $T_1, RH_1$               | 24.1 °C,<br>25.8%                        | $\pm 0.2$ °C of reading,<br>$\pm 2\%$ of reading | Inlet air<br>(downstream<br>from the<br>pump) | Govee T &<br>R.H. meter              |
| $P_1$                     | 14.7+6.5 psi                             | 2% F.S. for the<br>middle half                   | Inlet air<br>(downstream<br>from the<br>pump) | Pressure gauge                       |
| $Q_1$                     | 28 LPM<br>(before<br>correction)         | $\pm 3\%$ FS                                     | System inlet                                  | Dwyer flow<br>meter (4 – 40<br>LPM)  |
| $P_2$                     | 0 psi (normal)                           | 2% F.S. for the<br>middle half                   | Manifold 1                                    | Pressure gauge                       |
| $T_2, RH_2$               | 26.7 °C,<br>57.2%                        | $\pm 0.2$ °C of reading,<br>$\pm 2\%$ FS         | Manifold 1                                    | Govee T & RH<br>meter                |
| Single tube<br>flow rate  | 6.5 LPM<br><br>LPM (after<br>correction) | $\pm 3\%$ FS                                     | Manifold 2                                    | Dwyer flow<br>meter (0 – 10<br>LPM)  |
| $P_3$                     | -10 inHg (-5<br>psi)                     | 2% FS for the middle<br>half                     | Manifold 2                                    | Vacuum gauge                         |
| $T_3, RH_3$               | 26.1 °C,<br>54.2%                        | $\pm 0.2$ °C of reading,<br>$\pm 2\%$ FS         | Manifold 2                                    | Govee T & RH<br>meter                |
| Ice bucket<br>temperature | 0 ~ 2 °C                                 | N/A                                              | Ice buckets                                   | Thermocouples                        |
| $Q_3$                     | 40 LPM<br>(before<br>correction)         | $\pm 3\%$ FS                                     | System<br>outlet                              | Dwyer flow<br>meter (0 – 100<br>LPM) |

25 
$$Q_1 = Q_{ob,1} \sqrt{\frac{36.0544P_1+530}{T_1+460}} \quad [37]$$

26 Plugging in  $Q_{ob,1} = 28$  L/min,  $P_1 = 6.5$  psi,  $T_1 = 75$  °F to Eqn. [37],  $Q_1 = 33.5$  L/min,

27 Plugging in standard temperature and standard pressure, and  $RH_1 = 25.8\%$  to the psychometric  
 28 calculator, the result is that  $v_1 = 0.839 \text{ m}^3/\text{kg}$ ,

$$29 \quad \dot{m}_{a1} = \frac{Q_1}{v_1} = 6.65 \times 10^{-4} \text{ kg}_a/\text{s} \quad [38]$$

$$30 \quad Q_3 = Q_{ob,3} \sqrt{\frac{36.0544P_3 + 530}{T_3 + 460}} \quad [39]$$

31 Plugging in  $Q_{ob,3} = 40 \text{ L/min}$ ,  $P_3 = -5 \text{ psi}$ ,  $T_3 = 79 \text{ }^\circ\text{F}$  to Eqn. [39],  $Q_3 = 32.2 \text{ LPM}$ ,

32 Plugging in standard temperature and standard pressure, and  $RH_3 = 54.2\%$  to the psychometric  
 33 calculator, the result is that  $v_3 = 0.845 \text{ m}^3/\text{kg}$ ,

$$34 \quad \dot{m}_{a3} = \frac{Q_3}{v_3} = 6.35 \times 10^{-4} \text{ kg}_a/\text{s} \quad [40]$$

$$35 \quad \dot{m}_{a3} = \frac{Q_{ob,3}}{v_3} \sqrt{\frac{36.0544P_3 + 530}{T_3 + 460}} \quad [41]$$

$$36 \quad \% \text{ difference} = \frac{\dot{m}_{a1} - \dot{m}_{a3}}{\dot{m}_{a1}} \times 100\% = 4.51\% \quad [42]$$

37 So, there is 4.51% loss of mass flow rate between  $\dot{m}_{a1}$  and  $\dot{m}_{a3}$ .

$$38 \quad \dot{m}_{w,nebu} = \dot{m}_{a1}(w_2 - w_1) \quad [43]$$

$$39 \quad w_1 = 0.00331 \text{ kg}_w/\text{kg}_a$$

$$40 \quad w_2 = 0.0107 \text{ kg}_w/\text{kg}_a$$

$$41 \quad \text{And thus } \dot{m}_{w,nebu} = 3.27 \times 10^{-5} \text{ kg}_w/\text{s}$$

$$42 \quad \dot{m}_{w,imp} = \dot{m}_{a3}w_3 - \dot{m}_{a1}w_2 \quad [44]$$

$$43 \quad w_3 = 0.01753 \text{ kg}_w/\text{kg}_a$$

$$44 \quad \text{And thus } \dot{m}_{w,imp} = -4.02 \times 10^{-6} \text{ kg}_w/\text{s}$$

45 Change of water vapor content in the system,

$$46 \quad \dot{m}_{w,nebu} + \dot{m}_{w,imp} = 4.22 \times 10^{-6} \text{ kg}_w/\text{s} \quad [45]$$

47 Propagation of error (plugging in numbers):

$$48 \quad \theta_{Q_{ob,1}} = \frac{\partial \dot{m}_{a1}}{\partial Q_{ob,1}} = \frac{1}{v_1} \sqrt{\frac{36.0544P_1 + 530}{T_1 + 460}} = 2.04 \text{ kg}_a/\text{m}^3 \quad [46]$$

$$49 \quad U_{Q_{ob,1}} = 3\% \times 40 \text{ L/min} = 1.2 \text{ L/min} = \pm 2 \times 10^{-5} \text{ m}^3/\text{s} \quad [47]$$

$$50 \quad \theta_{Q_{ob,1}} \times U_{Q_{ob,1}} = 4.10 \times 10^{-5} \text{ kg}_a/\text{s} \text{ Eqn. [48]}$$

$$51 \quad \theta_{P_1} = \frac{\partial \dot{m}_{a1}}{\partial P_1} = \frac{18.0272Q_{ob,1}}{v_1 \sqrt{(36.0544P_1 + 530)(T_1 + 460)}} = 2.24 \times 10^{-5} \text{ kg}_a/(\text{s} \cdot \text{psi}) \quad [49]$$

$$\begin{aligned}
52 \quad & U_{P_1} = 2\% \times 30 \text{ psi} = \pm 0.6 \text{ psi} \quad [50] \\
53 \quad & \theta_{P_1} \times U_{P_1} = 1.344 \times 10^{-5} \text{ kg}_a/\text{s} \quad [51] \\
54 \quad & \theta_{T_1} = \frac{\partial Q_1}{\partial T_1} = \frac{(-18.0272P_1 - 265)Q_{ob,1}}{(T_1 + 460)^2 v_1 \sqrt{\frac{36.0544P_1 + 530}{T_1 + 460}}} = 8.87 \times 10^{-7} \text{ kg}_a/(\text{s} \cdot ^\circ\text{C}) \quad [52] \\
55 \quad & U_{T_1} = \pm 0.2^\circ\text{C} \\
56 \quad & \theta_{T_1} \times U_{T_1} = 1.774 \times 10^{-7} \text{ kg}_a/\text{s} \quad [53] \\
57 \quad & \theta_{v_1} = \frac{\partial Q_1}{\partial v_1} = -\frac{Q_{ob,1} \sqrt{\frac{36.0544P_1 + 530}{T_1 + 460}}}{v_1^2} = -0.00162 \text{ m}^3/\text{kg} \quad [54] \\
58 \quad & U_{v_1} = \pm 2.25\% \\
59 \quad & \theta_{v_1} \times U_{v_1} = -3.64 \times 10^{-5} \text{ kg}_a/\text{s} \quad [55] \\
60 \quad & U_{\dot{m}_{a1}} = \sqrt{(\theta_{Q_{ob,1}} U_{Q_{ob,1}})^2 + (\theta_{P_1} U_{P_1})^2 + (\theta_{T_1} U_{T_1})^2 + (\theta_{v_1} U_{v_1})^2} = 5.65 \times 10^{-5} \text{ kg}_a/\text{s} \quad [56] \\
61 \quad & \dot{m}_{a1} = 9.50 \times 10^{-4} \text{ kg}_a/\text{s} \pm 5.65 \times 10^{-5} \text{ kg}_a/\text{s} = 6.65 \times 10^{-4} \text{ kg}_a/\text{s} \pm 8.50\% \quad [57] \\
62 \quad & \theta_{Q_{ob,3}} = \frac{\partial \dot{m}_{a3}}{\partial Q_{ob,3}} = \frac{1}{v_3} \sqrt{\frac{36.0544P_3 + 530}{T_3 + 460}} = 0.61 \text{ kg}_a/\text{m}^3 \quad [58] \\
63 \quad & U_{Q_{ob,3}} = 3\% \times 40 \text{ L/min} = 1.2 \text{ L/min} = \pm 2 \times 10^{-5} \text{ m}^3/\text{s} \quad [59] \\
64 \quad & \theta_{Q_{ob,3}} \times U_{Q_{ob,3}} = 1.22 \times 10^{-5} \text{ kg}_a/\text{s} \quad [60] \\
65 \quad & \theta_{P_3} = \frac{\partial \dot{m}_{a3}}{\partial P_3} = \frac{18.0272Q_{ob,3}}{v_3 \sqrt{(36.0544P_3 + 530)(T_3 + 460)}} = 2.1 \times 10^{-5} \text{ kg}_a/(\text{s} \cdot \text{psi}) \quad [61] \\
66 \quad & U_{P_3} = 2\% \times 30 \text{ psi} = \pm 0.6 \text{ psi} \quad [62] \\
67 \quad & \theta_{P_3} \times U_{P_3} = 1.26 \times 10^{-5} \text{ kg}_a/\text{s} \quad [63] \\
68 \quad & \theta_{T_3} = \frac{\partial Q_3}{\partial T_3} = \frac{(-18.0272P_3 - 265)Q_{ob,3}}{(T_3 + 460)^2 v_3 \sqrt{\frac{36.0544P_3 + 530}{T_3 + 460}}} = 3.77 \times 10^{-7} \text{ kg}_a/(\text{s} \cdot ^\circ\text{C}) \quad [64] \\
69 \quad & U_{T_3} = \pm 0.2^\circ\text{C} \\
70 \quad & \theta_{T_3} \times U_{T_3} = 7.54 \times 10^{-8} \text{ kg}_a/\text{s} \quad [65] \\
71 \quad & \theta_{v_3} = \frac{\partial Q_3}{\partial v_3} = -\frac{Q_{ob,3} \sqrt{\frac{36.0544P_3 + 530}{T_3 + 460}}}{v_3^2} = 3.08 \times 10^{-4} \text{ m}^3/\text{kg} \quad [66] \\
72 \quad & U_{v_3} = \pm 2.25\% \\
73 \quad & \theta_{v_3} \times U_{v_3} = 6.92 \times 10^{-6} \text{ kg}_a/\text{s} \quad [67]
\end{aligned}$$

$$U_{\dot{m}_{a3}} = \sqrt{(\theta_{Q_{ob,3}} U_{Q_{ob,3}})^2 + (\theta_{P_3} U_{P_3})^2 + (\theta_{T_3} U_{T_3})^2 + (\theta_{v_3} U_{v_3})^2} = 1.89 \times 10^{-5} \text{ kg}_a/\text{s} \quad [68]$$

$$\dot{m}_{a3} = 4.07 \times 10^{-4} \text{ kg}_a/\text{s} \pm 1.89 \times 10^{-5} \text{ kg}_a/\text{s} = 4.07 \times 10^{-4} \text{ kg}_a/\text{s} \pm 4.64\% \quad [69]$$

## 2 Supplementary Figures and Tables

### 2.1 Supplementary Figures

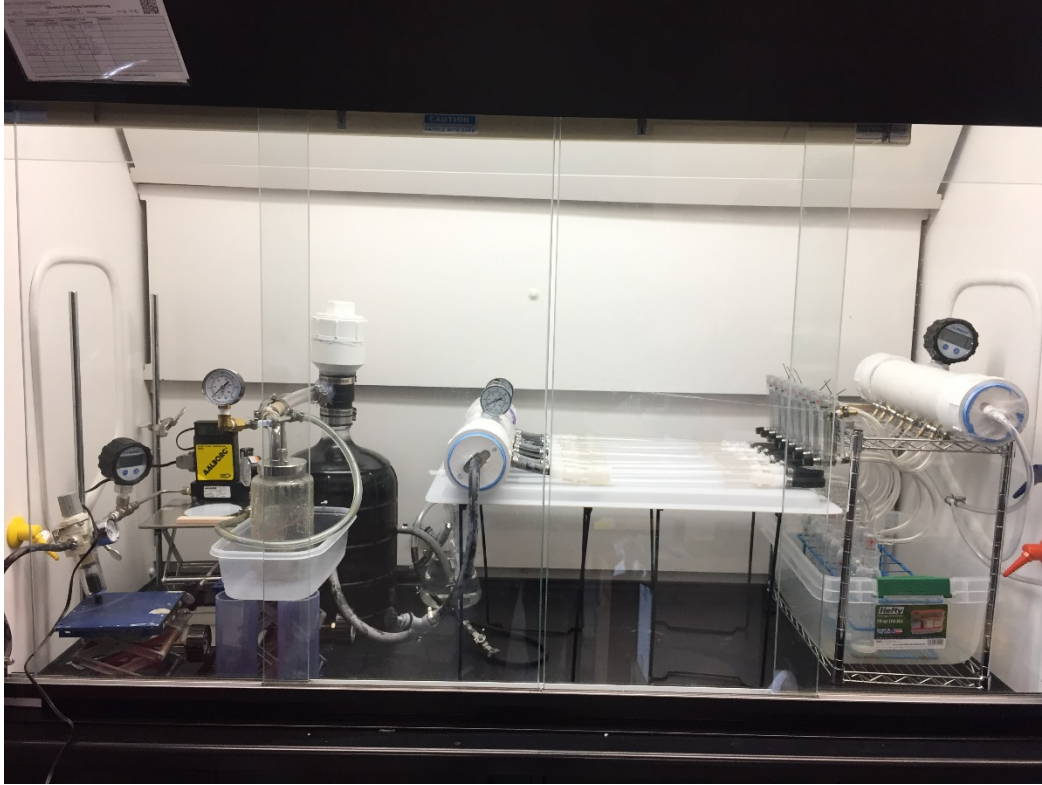

**Supplementary Figure 1.** Experimental setup for the generation of airborne PRRS virus and treatment with U.V. light inside a fume hood. An air compressor and a vacuum pump were located outside of the hood due to the limitation of the space. The left side air compressor was responsible for pressurizing air flowing into the system, and the right-side pump was vacuuming exhaust air coming out of the system.

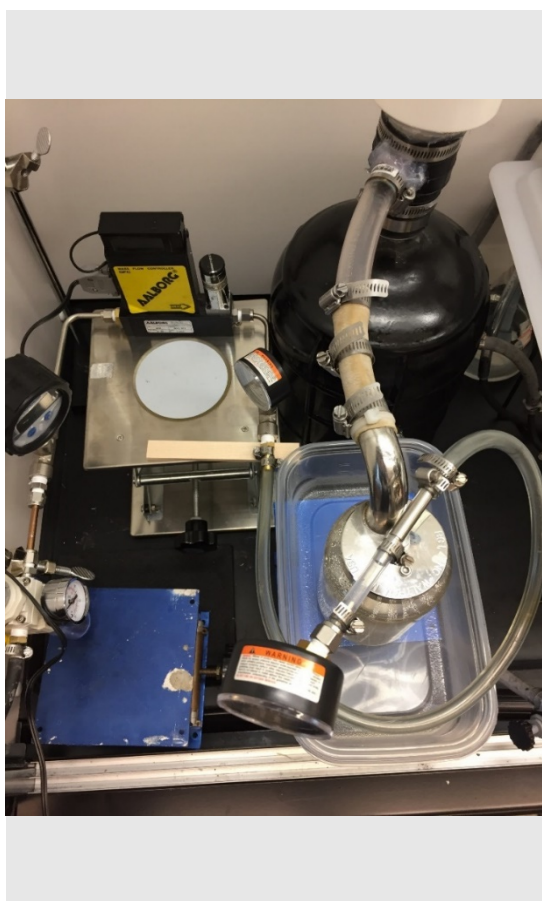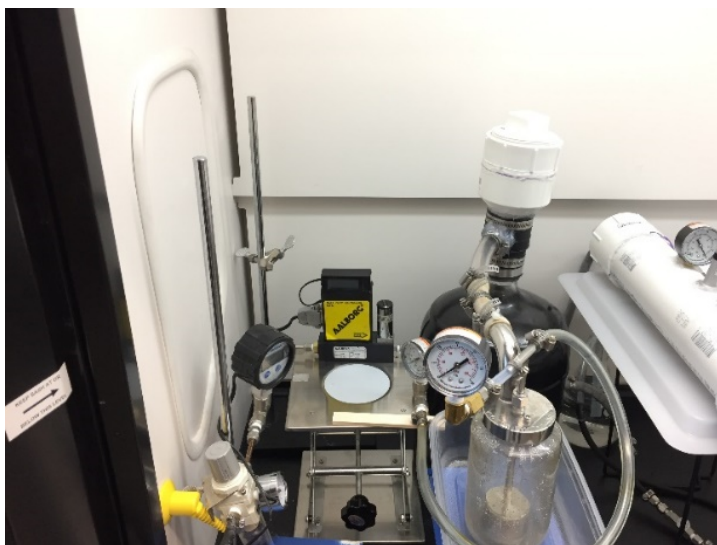

84

85 **Supplementary Figure 2.** View of the aerosolization section. It consists of pressure gauges and a  
 86 mass flow controller, Collison nebulizer, all of which were connected by compression fittings.

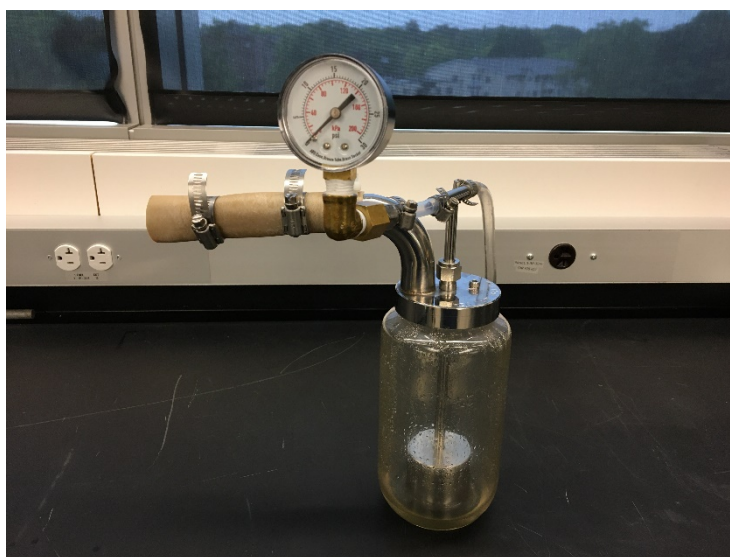

87

88 **Supplementary Figure 3.** A pressure gauge was installed on a 24-jet Collison nebulizer as an  
 89 optional verification suggested by the manufacturer to monitor the pressure within the nebulization  
 90 jar.

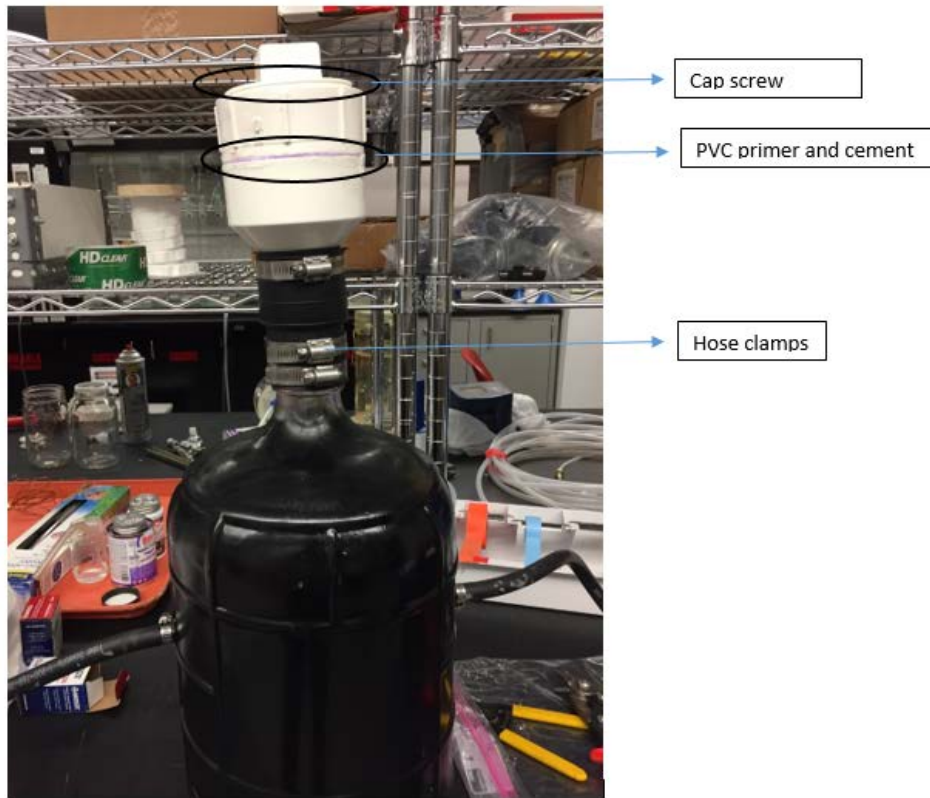

91

92 **Supplementary Figure 4.** The glass container was used to stabilize the aerosolized virus. A 3-gallon  
93 (12 L) glass carboy (painted in black on the outlook to prevent lighting effect) was installed with  
94 rubber hoses, PVC connectors, and hose clamps. PVC primer and cement were used to seal the gaps.

95



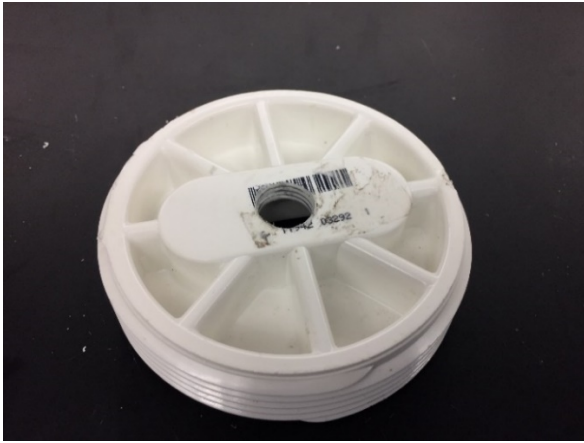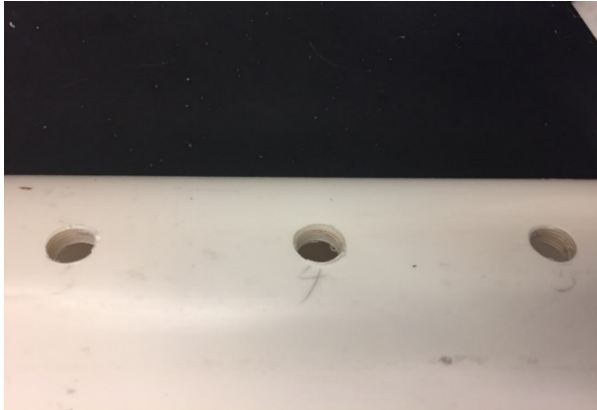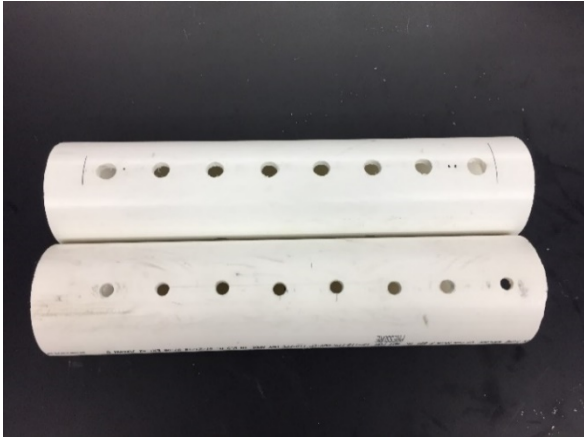

**Supplementary Figure 5.** Details of the construction of the manifold system for distribution of aerosolized virus into separate treatments (I). Threaded holes were used to mount brass fittings into Manifolds (1 and 2) (PVC pipes, ID = 3 in) to ensure a tight fit and lower the risk of leakage. All drilled holes were threaded.



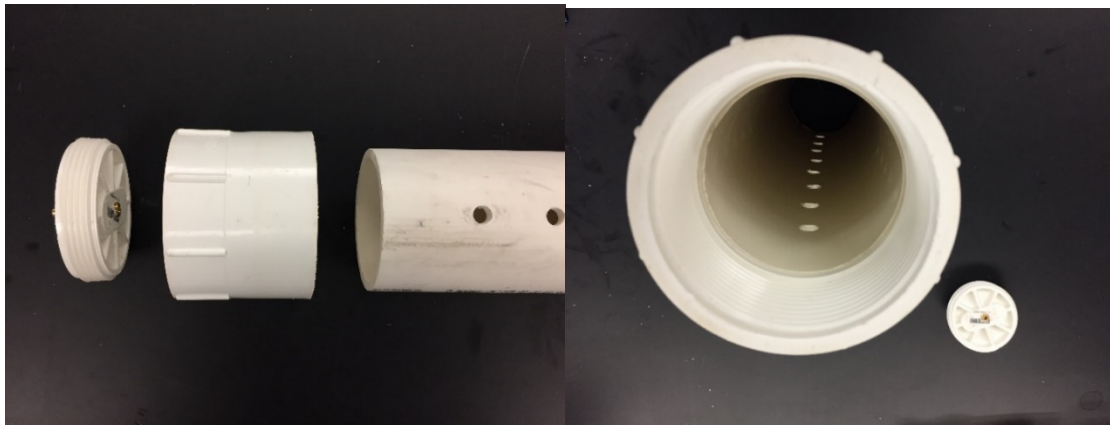

102

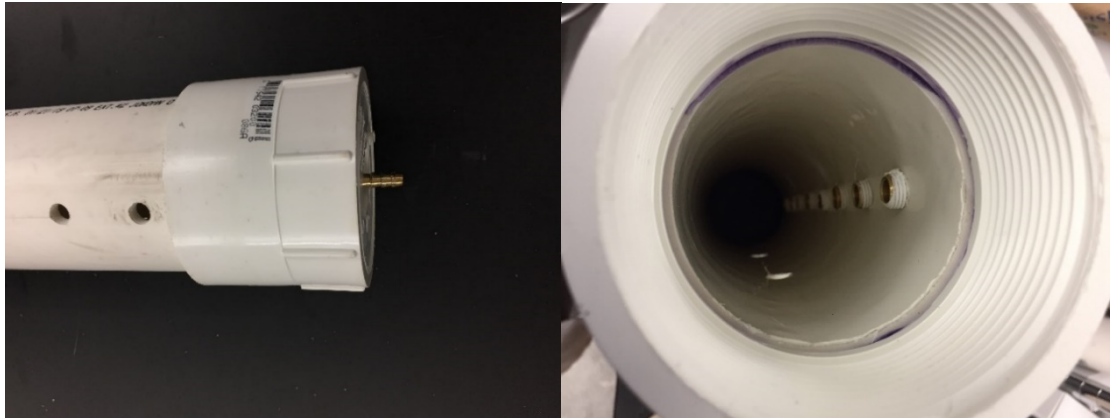

103

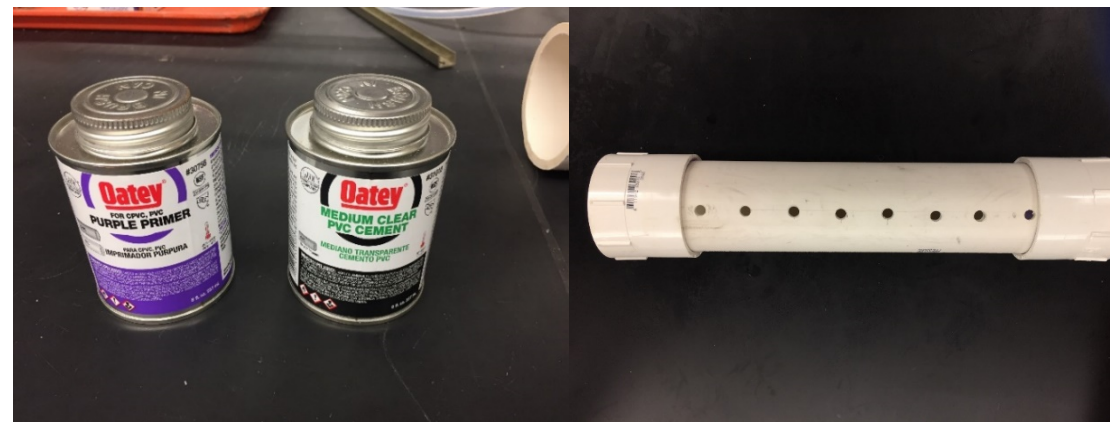

104

105 **Supplementary Figure 6.** Details of the manifold system for distribution of aerosolized virus into  
 106 separate treatments (II). PVC adapter (ID = 3.5 in or 89 mm) and screw caps (ID = 3.5 in or 89 mm)  
 107 were used to close both ends of Manifolds (1 and 2). PVC primer and cement were used to seal the  
 108 gaps between these parts.

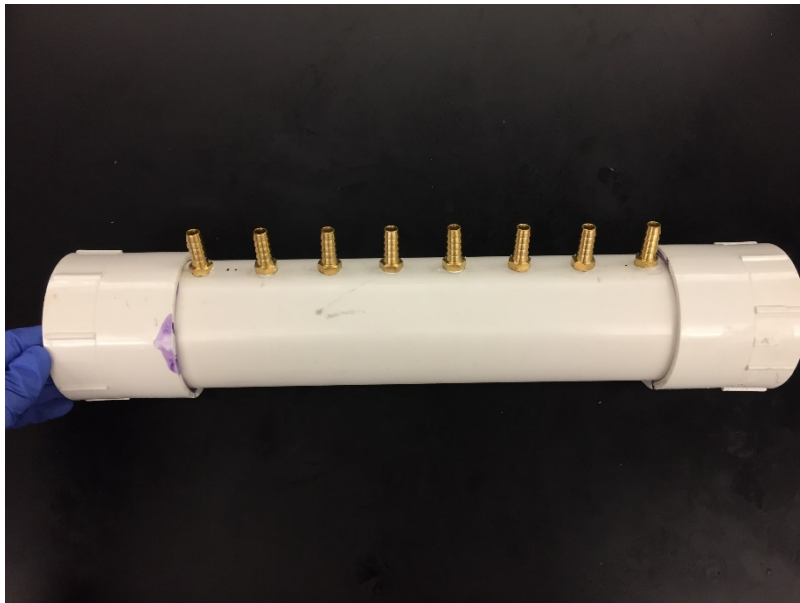

109

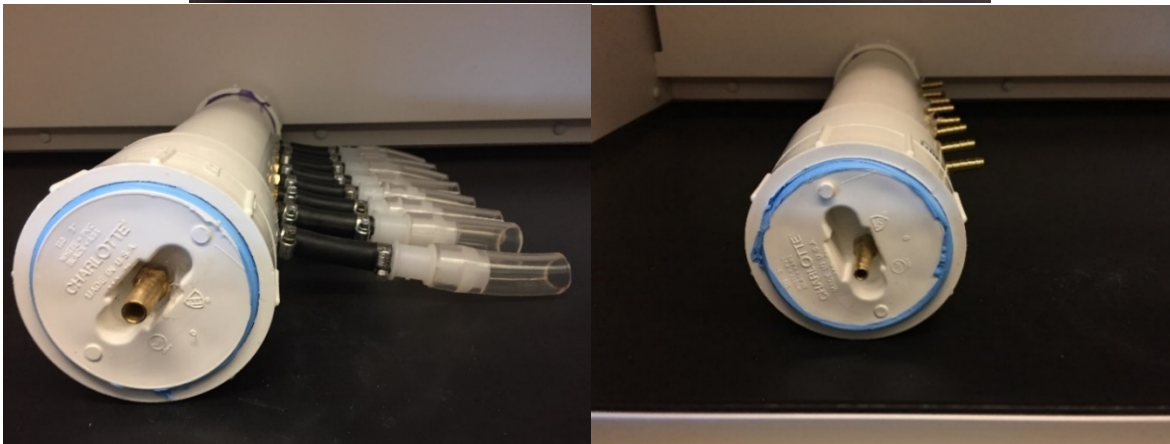

110

111 **Supplementary Figure 7.** Details of the manifold system for distribution of aerosolized virus into  
 112 separate treatments (III). Two types of barbed hose fittings, 9.52 mm (3/8 in) and 6.35 mm (1/4 in),  
 113 were installed on Manifold 1 (left) and 2 (right), respectively. Threaded fittings are used to ensure a  
 114 tight fit and lower the risk of leakage.

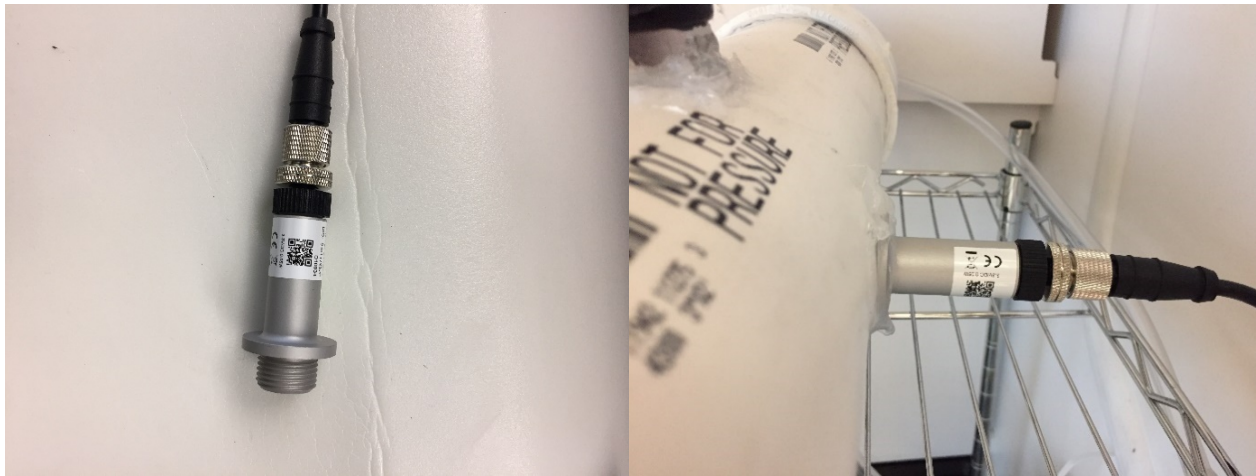

115

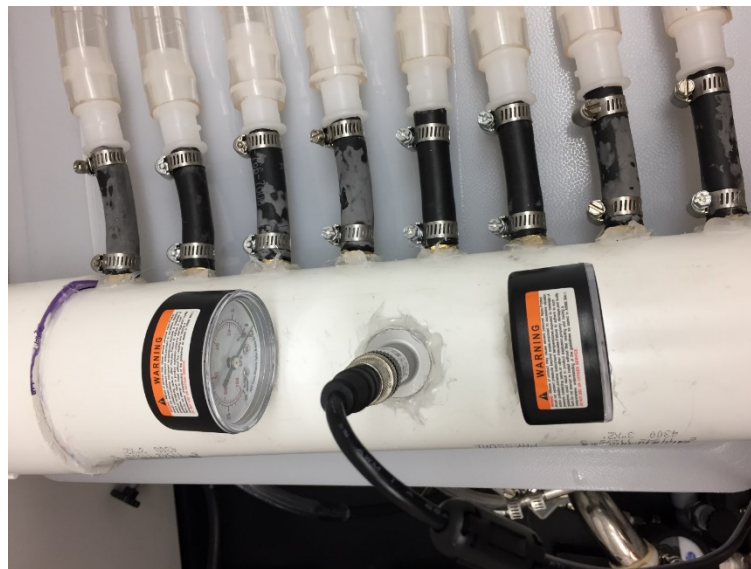

116

117 **Supplementary Figure 8.** Smart temperature and humidity probe (SP-004-4, Omega Engineering  
 118 Inc., Stamford, CT 06907) and corresponding USB cords (IF-001, Omega Engineering Inc.,  
 119 Stamford, CT 06907) were mounted on both Manifolds (1 and 2) to measure temperature and relative  
 120 humidity in the Manifolds. The heads of the probes were threaded by the manufacturer so they could  
 121 fit in the holes and threads that were drilled on the Manifolds. A pressure gauge (0 – 30 psi) and  
 122 vacuum gauge (0 - 30 in Hg) were installed for Manifold 1.



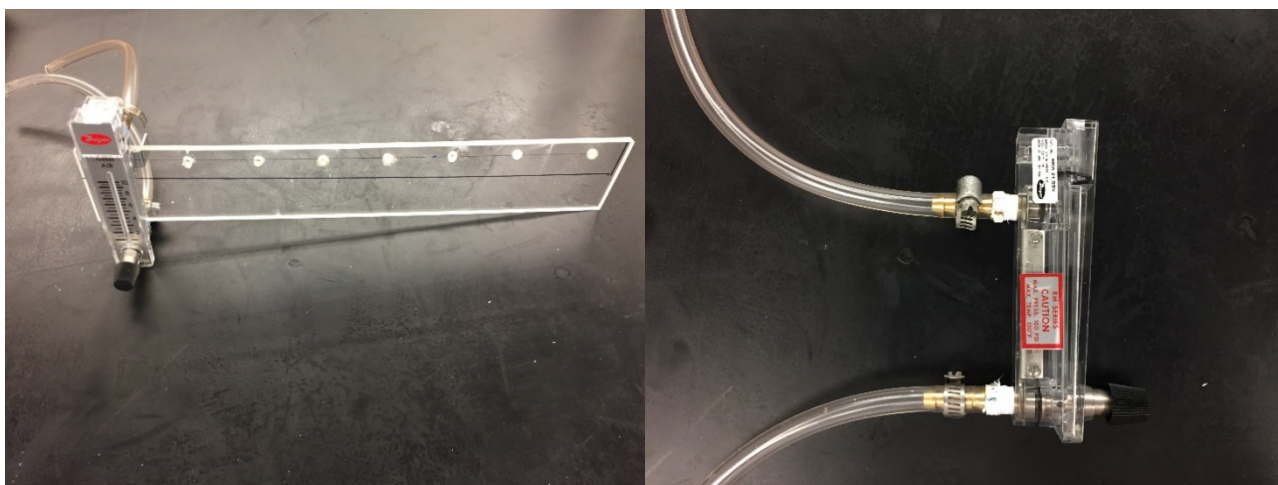

**Supplementary Figure 9.** Visual verification of air flowrate in each treatment (I). An acrylic board was cut, and eight holes were drilled on it so that the rotameters (RMA-21-SSV, Dywer Inc. Michigan City, IN, USA) can be mounted on it.

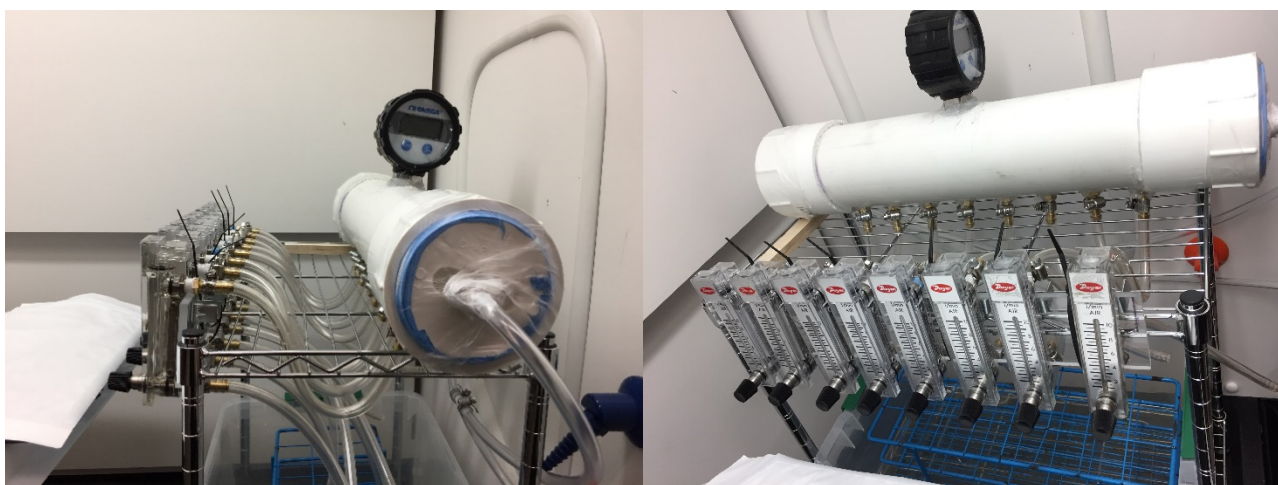

**Supplementary Figure 10.** Visual verification of air flowrate in each treatment (II). Eight Dwyer flowmeters were mounted on a stainless-steel shelf so that they can be positioned vertically to ensure accurate readings. A digital pressure gauge (range  $-15$  psi to  $15$  psi,  $\pm 0.5\%$  full scale) (DPG108-015CG, Omega Engineering Inc., Stamford, CT 06907) was installed on top of Manifold 2. The same installation procedure was followed as for other sensors and gauges.

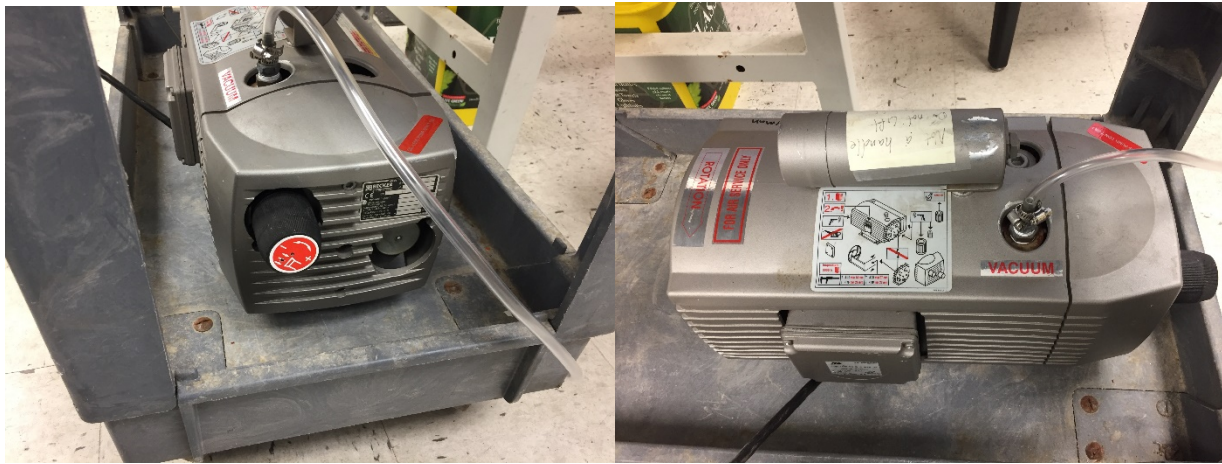

**Supplementary Figure 11.** Details of the air handling system. An air vacuum pump (VT 4.16 rotary vane vacuum pump, Becker Pumps Corp., Cuyahoga Falls, OH, USA) that sucks air from the outlet of the system to drive the sampling process in the impingers.
